# Supplementary material
Source: PubMed Central journal article supplement (PMC3396773)
Supplement: NIHMS359558-supplement-Supp_Table_S1.pdf [file NIHMS359558-supplement-Supp_Table_S1.pdf]

| Gene symbol   | Sequence name | Forward primer            | Reverse primer           | Amplicon size |
|---------------|---------------|---------------------------|--------------------------|---------------|
| <i>act-1</i>  | T04C12.6      | GCTGGACGTGATCTTACTGATTACC | GTAGCAGAGCTTCTCCTTGATGTC | 114           |
| <i>sodh-2</i> | K12G11.4      | GATCACGCATGGATGTTGATGA    | ATTGGAACATGCACAATTCCACG  | 66            |
| D2063.1       | D2063.1       | AGCCGTCAATGTCCCATTAG      | CTTTCCATCGTGCATTTTTGTG   | 77            |
| H24K24.3      | H24K24.3      | GCAGGGAAATGGATTTATGC      | TTCACTGAACGTGGAGCATC     | 94            |
| <i>alh-1</i>  | F54D8.3       | GGCATCTTTGGAATCTTTGGA     | TCCGGCGTAATAACGAAGAG     | 97            |
| <i>alh-3</i>  | F36H1.6       | TCCCCACCAACGATTCTGTC      | AAACTCCAGCAGCAAGTCC      | 160           |
| <i>alh-5</i>  | T08B1.3       | ATGCCAAGGAGAGCAAAGAC      | CATTTCCAGCAAGCACGAC      | 105           |
| <i>alh-6</i>  | F56D12.1      | TCGCCGAGAATTTGGATAAC      | GGATGGATGCACAAAGTGG      | 86            |
| <i>alh-7</i>  | F45H10.1      | CTTGATGTCGCTGTGAATGGAA    | CATGGACGTAGATTTCGATTGGC  | 98            |
| <i>alh-8</i>  | F13D12.4      | CGGAATCCAGTTCTACACTC      | CTGTGGGAACGACATTTGTG     | 91            |
| <i>alh-9</i>  | F01F1.6       | TGGAGGCAGTACATGAGACG      | TTAATTCCCTGAGCCAAAGG     | 74            |
| <i>alh-10</i> | C54D1.4       | CAGTTTGGTGCAACACTTGG      | TCGTGGAGACCTTCTCTTCC     | 91            |
| <i>alh-11</i> | F42G9.5       | CAGGATTCGGACGTGAAAAC      | TTGACAAAGACCGACTTCAGG    | 70            |
| <i>alh-13</i> | T22H6.2       | TTCCAACAAAGAACGTGGTG      | ATCGAGTCCAGCAGATTTGG     | 121           |

**Supplemental Table 1.** Primer sequences and amplicon length.
