# Supplementary material
Source: PubMed Central journal article supplement (PMC3396773)

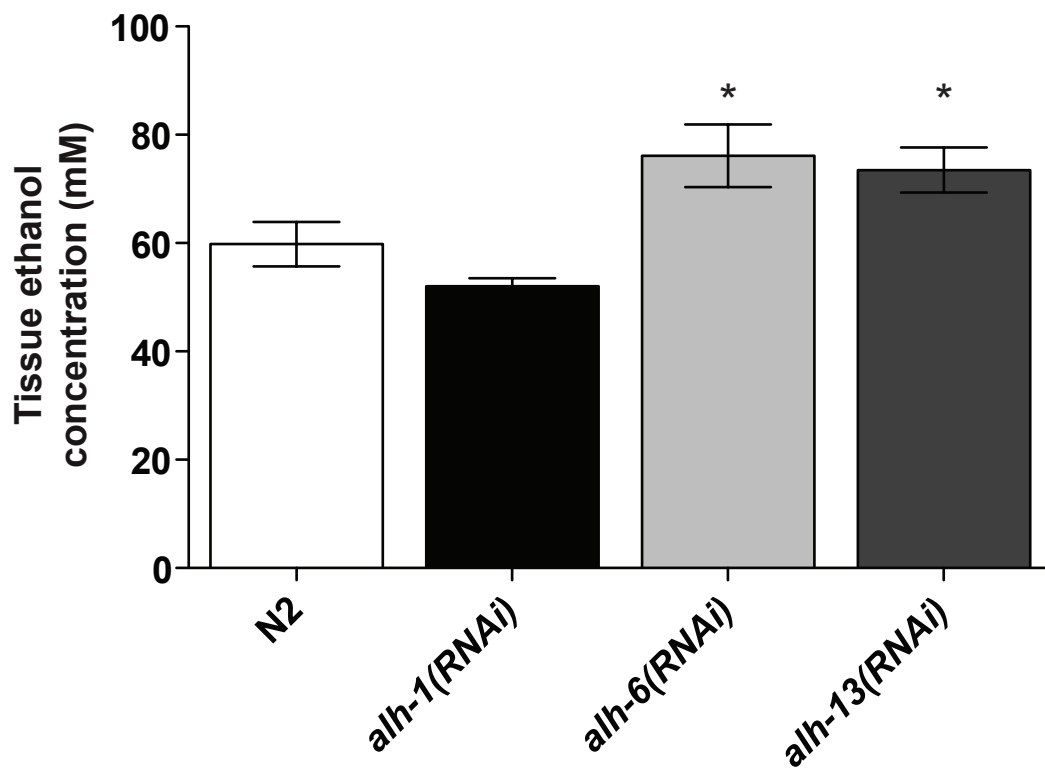

Supplement: NIHMS359558-supplement-Supp_Fig_S1.pdf [file NIHMS359558-supplement-Supp_Fig_S1.pdf]
